# Supplementary material for: Remarkable dominance of myctophid otoliths in Upper Miocene Chagres Formation, Caribbean Panama
Source: PeerJ. 2025 Oct 17;13:e20155. doi: 10.7717/peerj.20155 (PMC12536803; doi:10.7717/peerj.20155)
Supplement: Supplemental Information 1 [file peerj-13-20155-s001.xlsx]

## Sheet: Table S1
Bulk sample	Sediment weight (kg)	Fish otoliths		Isistius teeth
		Counts (n)	Density (n/kg)	Counts (n)	Density (n/kg)
CH18-1-1	NA	725	NA	NA	NA
AT24-2-1	0.59	456	775.51	6	10.2
AT24-2-2	0.69	226	325.65	2	2.88
AT24-2-3	0.65	338	520	2	3.08
AT24-2-4	0.55	266	487.18	3	5.49
AT24-2-5	0.55	135	247.25	2	3.66
AT24-2-6	0.54	185	343.87	0	0
AT24-2-7	0.47	73	154.66	2	4.24
AT24-2-8	0.67	83	124.25	2	2.99
AT24-2-9	0.59	93	158.7	2	3.41
AT24-2-10	0.71	122	172.32	3	4.24
AT24-2-11	0.7	110	156.7	6	8.55
AT24-2-12	0.67	214	319.4	4	5.97
AT24-2-13	0.66	227	343.94	4	6.06
AT24-2-14	0.69	108	156.07	4	5.78
AT24-2-15	0.63	184	293.93	2	3.19
AT24-2-16	0.57	124	217.54	1	1.75
AT24-2-17	0.69	130	188.95	2	2.91
AT24-2-18	0.54	214	397.77	0	0
AT24-2-19	0.64	124	193.75	3	4.69
AT24-2-20	0.57	86	150.35	3	5.24
AT24-2-21	0.66	104	158.54	5	7.62
AT24-2-22	0.59	104	176.27	0	0
AT24-2-23	0.6	98	163.88	0	0
AT24-2-24	0.49	107	220.16	2	4.12
AT24-2-25	0.67	176	261.13	0	0
AT24-2-26	0.58	251	434.26	8	13.84
AT24-2-27	0.6	194	322.26	2	3.32
AT24-2-28	0.69	148	215.12	1	1.45
AT24-2-29	0.54	165	306.69	0	0
AT24-2-30	0.51	187	363.81	3	5.84
AT24-2-31	0.68	209	309.17	1	1.48
AT24-2-32	0.39	111	287.56	0	0
AT24-2-33	0.53	134	253.79	2	3.79
			average = 278.80±135.59		average = 4.84±2.78
