# Supplementary material for: Remarkable dominance of myctophid otoliths in Upper Miocene Chagres Formation, Caribbean Panama
Source: PeerJ. 2025 Oct 17;13:e20155. doi: 10.7717/peerj.20155 (PMC12536803; doi:10.7717/peerj.20155)
Supplement: Supplemental Information 2 [file peerj-13-20155-s002.xlsx]

## Sheet: Raw data
Sample	Family	Taxa	No. of otoliths
Ch18-1-1	Congridae	Rhynchoconger sp.	1
Ch18-1-1	Congridae	Chiloconger aflorens sp. nov.	1
Ch18-1-1	Sternoptychidae	Polyipnus sp.	7
Ch18-1-1	Myctophidae	Benthosema pluridens Schwarzhans & Aguliera, 2013	8
Ch18-1-1	Myctophidae	Dasyscopelus degraciai (Schwarzhans & Aguliera, 2013)	10
Ch18-1-1	Myctophidae	Diaphus aequalis Schwarzhans & Aguliera, 2013	10
Ch18-1-1	Myctophidae	Diaphus apalus Schwarzhans & Aguliera, 2013	10
Ch18-1-1	Myctophidae	Diaphus barrigonensis Schwarzhans & Aguliera, 2013	3
Ch18-1-1	Myctophidae	Diaphus dumerilii (Bleeker, 1856)	10
Ch18-1-1	Myctophidae	Diaphus multiserratus Schwarzhans & Aguliera, 2013	6
Ch18-1-1	Myctophidae	Diaphus pedemontanus (Robba, 1970)	6
Ch18-1-1	Myctophidae	Diaphus rodriguezi Schwarzhans & Aguliera, 2013	132
Ch18-1-1	Myctophidae	Diogenichthys sp.	1
Ch18-1-1	Myctophidae	Myctophidae indet.	501
Ch18-1-1	Myctophidae	Myctophum arcanum Schwarzhans & Aguliera, 2013	2
Ch18-1-1	Myctophidae	Myctophum affine (Lütken, 1892)	1
Ch18-1-1	Myctophidae	Lobianchia johnfitchi Schwarzhans & Aguliera, 2013	9
Ch18-1-1	Bregmacerotidae	Bregmaceros sp.	1
Ch18-1-1	Ophidiidae	Lepophidium limulum Schwarzhans & Aguliera, 2016	1
Ch18-1-1	Opistognathidae	Opistognathus sp.	1
Ch18-1-1	Trachichthyidae	Hoplostethus boyae sp. nov.	1
Ch18-1-1	Malakichthyidae	Malakichthys schwarzhansi sp. nov.	3
AT24-2-1	Sternoptychidae	Polyipnus sp.	6
AT24-2-1	Myctophidae	Benthosema pluridens Schwarzhans & Aguliera, 2013	9
AT24-2-1	Myctophidae	Dasyscopelus degraciai (Schwarzhans & Aguliera, 2013)	27
AT24-2-1	Myctophidae	Dasyscopelus inopinatus sp. nov.	4
AT24-2-1	Myctophidae	Diaphus aequalis Schwarzhans & Aguliera, 2013	11
AT24-2-1	Myctophidae	Diaphus apalus Schwarzhans & Aguliera, 2013	10
AT24-2-1	Myctophidae	Diaphus barrigonensis Schwarzhans & Aguliera, 2013	1
AT24-2-1	Myctophidae	Diaphus pedemontanus (Robba, 1970)	5
AT24-2-1	Myctophidae	Diaphus dumerilii (Bleeker, 1856)	19
AT24-2-1	Myctophidae	Diaphus multiserratus Schwarzhans & Aguliera, 2013	3
AT24-2-1	Myctophidae	Diaphus rodriguezi Schwarzhans & Aguliera, 2013	59
AT24-2-1	Myctophidae	Myctophidae indet.	288
AT24-2-1	Myctophidae	Myctophum arcanum Schwarzhans & Aguliera, 2013	3
AT24-2-1	Myctophidae	Lepidophanes inflectus Schwarzhans & Aguliera, 2013	3
AT24-2-1	Myctophidae	Lobianchia johnfitchi Schwarzhans & Aguliera, 2013	1
AT24-2-1	Bregmacerotidae	Bregmaceros sp.	4
AT24-2-1	Carapidae	Carapus sp.	2
AT24-2-1	Malakichthyidae	Malakichthys schwarzhansi sp. nov.	1
AT24-2-2	Sternoptychidae	Polyipnus sp.	2
AT24-2-2	Myctophidae	Dasyscopelus degraciai (Schwarzhans & Aguliera, 2013)	13
AT24-2-2	Myctophidae	Dasyscopelus inopinatus sp. nov.	4
AT24-2-2	Myctophidae	Diaphus aequalis Schwarzhans & Aguliera, 2013	10
AT24-2-2	Myctophidae	Diaphus apalus Schwarzhans & Aguliera, 2013	10
AT24-2-2	Myctophidae	Diaphus barrigonensis Schwarzhans & Aguliera, 2013	1
AT24-2-2	Myctophidae	Diaphus pedemontanus (Robba, 1970)	2
AT24-2-2	Myctophidae	Diaphus dumerilii (Bleeker, 1856)	2
AT24-2-2	Myctophidae	Diaphus rodriguezi Schwarzhans & Aguliera, 2013	29
AT24-2-2	Myctophidae	Myctophidae indet.	144
AT24-2-2	Myctophidae	Lobianchia johnfitchi Schwarzhans & Aguliera, 2013	4
AT24-2-2	Bregmacerotidae	Bregmaceros sp.	4
AT24-2-2	indet.	indet.	1
AT24-2-3	Sternoptychidae	Polyipnus sp.	6
AT24-2-3	Myctophidae	Benthosema pluridens Schwarzhans & Aguliera, 2013	4
AT24-2-3	Myctophidae	Dasyscopelus degraciai (Schwarzhans & Aguliera, 2013)	26
AT24-2-3	Myctophidae	Diaphus aequalis Schwarzhans & Aguliera, 2013	12
AT24-2-3	Myctophidae	Diaphus apalus Schwarzhans & Aguliera, 2013	2
AT24-2-3	Myctophidae	Diaphus barrigonensis Schwarzhans & Aguliera, 2013	1
AT24-2-3	Myctophidae	Diaphus pedemontanus (Robba, 1970)	6
AT24-2-3	Myctophidae	Diaphus dumerilii (Bleeker, 1856)	4
AT24-2-3	Myctophidae	Diaphus rodriguezi Schwarzhans & Aguliera, 2013	37
AT24-2-3	Myctophidae	Myctophidae indet.	218
AT24-2-3	Myctophidae	Myctophum arcanum Schwarzhans & Aguliera, 2013	1
AT24-2-3	Myctophidae	Lobianchia johnfitchi Schwarzhans & Aguliera, 2013	7
AT24-2-3	Bregmacerotidae	Bregmaceros sp.	8
AT24-2-3	Macrouridae	Coelorinchus sp.	1
AT24-2-3	Malakichthyidae	Malakichthys schwarzhansi sp. nov.	2
AT24-2-3	indet.	indet.	3
AT24-2-4	Sternoptychidae	Polyipnus sp.	7
AT24-2-4	Myctophidae	Benthosema pluridens Schwarzhans & Aguliera, 2013	5
AT24-2-4	Myctophidae	Dasyscopelus degraciai (Schwarzhans & Aguliera, 2013)	7
AT24-2-4	Myctophidae	Dasyscopelus inopinatus sp. nov.	6
AT24-2-4	Myctophidae	Diaphus aequalis Schwarzhans & Aguliera, 2013	7
AT24-2-4	Myctophidae	Diaphus apalus Schwarzhans & Aguliera, 2013	8
AT24-2-4	Myctophidae	Diaphus pedemontanus (Robba, 1970)	3
AT24-2-4	Myctophidae	Diaphus dumerilii (Bleeker, 1856)	2
AT24-2-4	Myctophidae	Diaphus rodriguezi Schwarzhans & Aguliera, 2013	25
AT24-2-4	Myctophidae	Diaphus multiserratus Schwarzhans & Aguliera, 2013	1
AT24-2-4	Myctophidae	Myctophidae indet.	179
AT24-2-4	Myctophidae	Myctophum affine (Lütken, 1892)	2
AT24-2-4	Myctophidae	Myctophum arcanum Schwarzhans & Aguliera, 2013	2
AT24-2-4	Myctophidae	Lobianchia johnfitchi Schwarzhans & Aguliera, 2013	2
AT24-2-4	Bregmacerotidae	Bregmaceros sp.	6
AT24-2-4	Carapidae	Carapus sp.	1
AT24-2-4	Ophidiidae	Lepophidium limulum Schwarzhans & Aguliera, 2016	1
AT24-2-4	Malakichthyidae	Malakichthys schwarzhansi sp. nov.	1
AT24-2-4	indet.	indet.	1
AT24-2-5	Myctophidae	Benthosema pluridens Schwarzhans & Aguliera, 2013	1
AT24-2-5	Myctophidae	Dasyscopelus degraciai (Schwarzhans & Aguliera, 2013)	9
AT24-2-5	Myctophidae	Dasyscopelus inopinatus sp. nov.	3
AT24-2-5	Myctophidae	Diaphus barrigonensis Schwarzhans & Aguliera, 2013	3
AT24-2-5	Myctophidae	Diaphus aequalis Schwarzhans & Aguliera, 2013	5
AT24-2-5	Myctophidae	Diaphus apalus Schwarzhans & Aguliera, 2013	7
AT24-2-5	Myctophidae	Diaphus dumerilii (Bleeker, 1856)	1
AT24-2-5	Myctophidae	Diaphus pedemontanus (Robba, 1970)	2
AT24-2-5	Myctophidae	Diaphus rodriguezi Schwarzhans & Aguliera, 2013	11
AT24-2-5	Myctophidae	Myctophidae indet.	88
AT24-2-5	Myctophidae	Myctophum affine (Lütken, 1892)	1
AT24-2-5	Myctophidae	Lobianchia johnfitchi Schwarzhans & Aguliera, 2013	1
AT24-2-5	Bregmacerotidae	Bregmaceros sp.	2
AT24-2-5	Macrouridae	Macrouridae indet.	1
AT24-2-6	Congridae	Chiloconger aflorens sp. nov.	1
AT24-2-6	Sternoptychidae	Polyipnus sp.	4
AT24-2-6	Myctophidae	Benthosema pluridens Schwarzhans & Aguliera, 2013	2
AT24-2-6	Myctophidae	Dasyscopelus degraciai (Schwarzhans & Aguliera, 2013)	11
AT24-2-6	Myctophidae	Dasyscopelus inopinatus sp. nov.	3
AT24-2-6	Myctophidae	Diaphus barrigonensis Schwarzhans & Aguliera, 2013	1
AT24-2-6	Myctophidae	Diaphus aequalis Schwarzhans & Aguliera, 2013	6
AT24-2-6	Myctophidae	Diaphus apalus Schwarzhans & Aguliera, 2013	2
AT24-2-6	Myctophidae	Diaphus dumerilii (Bleeker, 1856)	4
AT24-2-6	Myctophidae	Diaphus pedemontanus (Robba, 1970)	1
AT24-2-6	Myctophidae	Diaphus rodriguezi Schwarzhans & Aguliera, 2013	22
AT24-2-6	Myctophidae	Myctophidae indet.	115
AT24-2-6	Myctophidae	Myctophum affine (Lütken, 1892)	2
AT24-2-6	Myctophidae	Lobianchia johnfitchi Schwarzhans & Aguliera, 2013	3
AT24-2-6	Bregmacerotidae	Bregmaceros sp.	8
AT24-2-7	Sternoptychidae	Polyipnus sp.	1
AT24-2-7	Myctophidae	Dasyscopelus degraciai (Schwarzhans & Aguliera, 2013)	6
AT24-2-7	Myctophidae	Diaphus apalus Schwarzhans & Aguliera, 2013	1
AT24-2-7	Myctophidae	Diaphus multiserratus Schwarzhans & Aguliera, 2013	1
AT24-2-7	Myctophidae	Diaphus rodriguezi Schwarzhans & Aguliera, 2013	9
AT24-2-7	Myctophidae	Myctophidae indet.	51
AT24-2-7	Myctophidae	Lobianchia johnfitchi Schwarzhans & Aguliera, 2013	1
AT24-2-7	Bregmacerotidae	Bregmaceros sp.	3
AT24-2-8	Sternoptychidae	Polyipnus sp.	2
AT24-2-8	Myctophidae	Benthosema pluridens Schwarzhans & Aguliera, 2013	2
AT24-2-8	Myctophidae	Dasyscopelus degraciai (Schwarzhans & Aguliera, 2013)	1
AT24-2-8	Myctophidae	Diaphus aequalis Schwarzhans & Aguliera, 2013	4
AT24-2-8	Myctophidae	Diaphus apalus Schwarzhans & Aguliera, 2013	3
AT24-2-8	Myctophidae	Diaphus barrigonensis Schwarzhans & Aguliera, 2013	2
AT24-2-8	Myctophidae	Diaphus pedemontanus (Robba, 1970)	1
AT24-2-8	Myctophidae	Diaphus rodriguezi Schwarzhans & Aguliera, 2013	11
AT24-2-8	Myctophidae	Myctophidae indet.	55
AT24-2-8	Myctophidae	Myctophum affine (Lütken, 1892)	1
AT24-2-8	Bregmacerotidae	Bregmaceros sp.	1
AT24-2-9	Myctophidae	Dasyscopelus degraciai (Schwarzhans & Aguliera, 2013)	5
AT24-2-9	Myctophidae	Diaphus aequalis Schwarzhans & Aguliera, 2013	4
AT24-2-9	Myctophidae	Diaphus apalus Schwarzhans & Aguliera, 2013	3
AT24-2-9	Myctophidae	Diaphus dumerilii (Bleeker, 1856)	1
AT24-2-9	Myctophidae	Diaphus rodriguezi Schwarzhans & Aguliera, 2013	11
AT24-2-9	Myctophidae	Myctophidae indet.	67
AT24-2-9	Myctophidae	Lobianchia johnfitchi Schwarzhans & Aguliera, 2013	1
AT24-2-9	Bregmacerotidae	Bregmaceros sp.	1
AT24-2-10	Myctophidae	Dasyscopelus degraciai (Schwarzhans & Aguliera, 2013)	4
AT24-2-10	Myctophidae	Diaphus aequalis Schwarzhans & Aguliera, 2013	3
AT24-2-10	Myctophidae	Diaphus apalus Schwarzhans & Aguliera, 2013	1
AT24-2-10	Myctophidae	Diaphus dumerilii (Bleeker, 1856)	1
AT24-2-10	Myctophidae	Diaphus pedemontanus (Robba, 1970)	2
AT24-2-10	Myctophidae	Diaphus rodriguezi Schwarzhans & Aguliera, 2013	22
AT24-2-10	Myctophidae	Myctophidae indet.	82
AT24-2-10	Myctophidae	Lobianchia johnfitchi Schwarzhans & Aguliera, 2013	2
AT24-2-10	Myctophidae	Myctophum arcanum Schwarzhans & Aguliera, 2013	1
AT24-2-10	Bregmacerotidae	Bregmaceros sp.	4
AT24-2-11	Sternoptychidae	Polyipnus sp.	2
AT24-2-11	Myctophidae	Dasyscopelus degraciai (Schwarzhans & Aguliera, 2013)	4
AT24-2-11	Myctophidae	Dasyscopelus inopinatus sp. nov.	1
AT24-2-11	Myctophidae	Diaphus barrigonensis Schwarzhans & Aguliera, 2013	2
AT24-2-11	Myctophidae	Diaphus aequalis Schwarzhans & Aguliera, 2013	3
AT24-2-11	Myctophidae	Diaphus apalus Schwarzhans & Aguliera, 2013	2
AT24-2-11	Myctophidae	Diaphus pedemontanus (Robba, 1970)	5
AT24-2-11	Myctophidae	Diaphus rodriguezi Schwarzhans & Aguliera, 2013	11
AT24-2-11	Myctophidae	Myctophidae indet.	75
AT24-2-11	Myctophidae	Myctophum arcanum Schwarzhans & Aguliera, 2013	1
AT24-2-11	Myctophidae	Lobianchia johnfitchi Schwarzhans & Aguliera, 2013	2
AT24-2-11	Bregmacerotidae	Bregmaceros sp.	2
AT24-2-12	Sternoptychidae	Polyipnus sp.	3
AT24-2-12	Myctophidae	Dasyscopelus degraciai (Schwarzhans & Aguliera, 2013)	5
AT24-2-12	Myctophidae	Dasyscopelus inopinatus sp. nov.	1
AT24-2-12	Myctophidae	Diaphus aequalis Schwarzhans & Aguliera, 2013	1
AT24-2-12	Myctophidae	Diaphus apalus Schwarzhans & Aguliera, 2013	4
AT24-2-12	Myctophidae	Diaphus barrigonensis Schwarzhans & Aguliera, 2013	3
AT24-2-12	Myctophidae	Diaphus dumerilii (Bleeker, 1856)	4
AT24-2-12	Myctophidae	Diaphus multiserratus Schwarzhans & Aguliera, 2013	1
AT24-2-12	Myctophidae	Diaphus pedemontanus (Robba, 1970)	2
AT24-2-12	Myctophidae	Diaphus rodriguezi Schwarzhans & Aguliera, 2013	19
AT24-2-12	Myctophidae	Myctophidae indet.	158
AT24-2-12	Myctophidae	Myctophum arcanum Schwarzhans & Aguliera, 2013	3
AT24-2-12	Myctophidae	Lobianchia johnfitchi Schwarzhans & Aguliera, 2013	6
AT24-2-12	Bregmacerotidae	Bregmaceros sp.	3
AT24-2-12	Macrouridae	Coelorinchus sp.	1
AT24-2-13	Sternoptychidae	Polyipnus sp.	1
AT24-2-13	Myctophidae	Dasyscopelus degraciai (Schwarzhans & Aguliera, 2013)	15
AT24-2-13	Myctophidae	Diaphus aequalis Schwarzhans & Aguliera, 2013	9
AT24-2-13	Myctophidae	Diaphus apalus Schwarzhans & Aguliera, 2013	8
AT24-2-13	Myctophidae	Diaphus dumerilii (Bleeker, 1856)	5
AT24-2-13	Myctophidae	Diaphus multiserratus Schwarzhans & Aguliera, 2013	1
AT24-2-13	Myctophidae	Diaphus pedemontanus (Robba, 1970)	9
AT24-2-13	Myctophidae	Diaphus rodriguezi Schwarzhans & Aguliera, 2013	28
AT24-2-13	Myctophidae	Myctophidae indet.	142
AT24-2-13	Myctophidae	Myctophum affine (Lütken, 1892)	1
AT24-2-13	Bregmacerotidae	Bregmaceros sp.	4
AT24-2-13	Carapidae	Carapus sp.	2
AT24-2-13	Malakichthyidae	Malakichthys schwarzhansi sp. nov.	2
AT24-2-14	Myctophidae	Benthosema pluridens Schwarzhans & Aguliera, 2013	2
AT24-2-14	Myctophidae	Dasyscopelus degraciai (Schwarzhans & Aguliera, 2013)	5
AT24-2-14	Myctophidae	Dasyscopelus inopinatus sp. nov.	1
AT24-2-14	Myctophidae	Diaphus aequalis Schwarzhans & Aguliera, 2013	5
AT24-2-14	Myctophidae	Diaphus apalus Schwarzhans & Aguliera, 2013	3
AT24-2-14	Myctophidae	Diaphus dumerilii (Bleeker, 1856)	2
AT24-2-14	Myctophidae	Diaphus multiserratus Schwarzhans & Aguliera, 2013	1
AT24-2-14	Myctophidae	Diaphus rodriguezi Schwarzhans & Aguliera, 2013	13
AT24-2-14	Myctophidae	Myctophidae indet.	70
AT24-2-14	Myctophidae	Myctophum affine (Lütken, 1892)	2
AT24-2-14	Myctophidae	Lobianchia johnfitchi Schwarzhans & Aguliera, 2013	2
AT24-2-14	Bregmacerotidae	Bregmaceros sp.	1
AT24-2-14	Malakichthyidae	Malakichthys schwarzhansi sp. nov.	1
AT24-2-15	Sternoptychidae	Polyipnus sp.	3
AT24-2-15	Myctophidae	Dasyscopelus degraciai (Schwarzhans & Aguliera, 2013)	12
AT24-2-15	Myctophidae	Dasyscopelus inopinatus sp. nov.	2
AT24-2-15	Myctophidae	Diaphus aequalis Schwarzhans & Aguliera, 2013	2
AT24-2-15	Myctophidae	Diaphus apalus Schwarzhans & Aguliera, 2013	8
AT24-2-15	Myctophidae	Diaphus barrigonensis Schwarzhans & Aguliera, 2013	2
AT24-2-15	Myctophidae	Diaphus dumerilii (Bleeker, 1856)	7
AT24-2-15	Myctophidae	Diaphus pedemontanus (Robba, 1970)	3
AT24-2-15	Myctophidae	Diaphus rodriguezi Schwarzhans & Aguliera, 2013	32
AT24-2-15	Myctophidae	Myctophidae indet.	107
AT24-2-15	Myctophidae	Myctophum arcanum Schwarzhans & Aguliera, 2013	1
AT24-2-15	Myctophidae	Lobianchia johnfitchi Schwarzhans & Aguliera, 2013	2
AT24-2-15	Bregmacerotidae	Bregmaceros sp.	1
AT24-2-15	Carangidae	Carangidae indet.	1
AT24-2-15	indet.	indet.	1
AT24-2-16	Sternoptychidae	Polyipnus sp.	1
AT24-2-16	Myctophidae	Dasyscopelus degraciai (Schwarzhans & Aguliera, 2013)	7
AT24-2-16	Myctophidae	Dasyscopelus inopinatus sp. nov.	2
AT24-2-16	Myctophidae	Diaphus aequalis Schwarzhans & Aguliera, 2013	2
AT24-2-16	Myctophidae	Diaphus apalus Schwarzhans & Aguliera, 2013	3
AT24-2-16	Myctophidae	Diaphus barrigonensis Schwarzhans & Aguliera, 2013	1
AT24-2-16	Myctophidae	Diaphus dumerilii (Bleeker, 1856)	2
AT24-2-16	Myctophidae	Diaphus pedemontanus (Robba, 1970)	1
AT24-2-16	Myctophidae	Diaphus rodriguezi Schwarzhans & Aguliera, 2013	17
AT24-2-16	Myctophidae	Myctophidae indet.	82
AT24-2-16	Bregmacerotidae	Bregmaceros sp.	3
AT24-2-16	Malakichthyidae	Malakichthys schwarzhansi sp. nov.	2
AT24-2-16	indet.	indet.	1
AT24-2-17	Sternoptychidae	Polyipnus sp.	3
AT24-2-17	Myctophidae	Dasyscopelus degraciai (Schwarzhans & Aguliera, 2013)	3
AT24-2-17	Myctophidae	Dasyscopelus inopinatus sp. nov.	5
AT24-2-17	Myctophidae	Diaphus aequalis Schwarzhans & Aguliera, 2013	1
AT24-2-17	Myctophidae	Diaphus apalus Schwarzhans & Aguliera, 2013	2
AT24-2-17	Myctophidae	Diaphus barrigonensis Schwarzhans & Aguliera, 2013	1
AT24-2-17	Myctophidae	Diaphus dumerilii (Bleeker, 1856)	4
AT24-2-17	Myctophidae	Diaphus rodriguezi Schwarzhans & Aguliera, 2013	15
AT24-2-17	Myctophidae	Myctophidae indet.	96
AT24-2-18	Sternoptychidae	Polyipnus sp.	6
AT24-2-18	Myctophidae	Benthosema pluridens Schwarzhans & Aguliera, 2013	2
AT24-2-18	Myctophidae	Dasyscopelus degraciai (Schwarzhans & Aguliera, 2013)	9
AT24-2-18	Myctophidae	Dasyscopelus inopinatus sp. nov.	3
AT24-2-18	Myctophidae	Diaphus aequalis Schwarzhans & Aguliera, 2013	3
AT24-2-18	Myctophidae	Diaphus apalus Schwarzhans & Aguliera, 2013	9
AT24-2-18	Myctophidae	Diaphus barrigonensis Schwarzhans & Aguliera, 2013	3
AT24-2-18	Myctophidae	Diaphus dumerilii (Bleeker, 1856)	5
AT24-2-18	Myctophidae	Diaphus pedemontanus (Robba, 1970)	5
AT24-2-18	Myctophidae	Diaphus rodriguezi Schwarzhans & Aguliera, 2013	25
AT24-2-18	Myctophidae	Myctophidae indet.	139
AT24-2-18	Myctophidae	Lobianchia johnfitchi Schwarzhans & Aguliera, 2013	2
AT24-2-18	Bregmacerotidae	Bregmaceros sp.	1
AT24-2-18	Malakichthyidae	Malakichthys schwarzhansi sp. nov.	1
AT24-2-18	Carangidae	Carangidae indet.	1
AT24-2-19	Sternoptychidae	Polyipnus sp.	4
AT24-2-19	Myctophidae	Benthosema pluridens Schwarzhans & Aguliera, 2013	2
AT24-2-19	Myctophidae	Dasyscopelus degraciai (Schwarzhans & Aguliera, 2013)	2
AT24-2-19	Myctophidae	Diaphus aequalis Schwarzhans & Aguliera, 2013	1
AT24-2-19	Myctophidae	Diaphus apalus Schwarzhans & Aguliera, 2013	4
AT24-2-19	Myctophidae	Diaphus barrigonensis Schwarzhans & Aguliera, 2013	2
AT24-2-19	Myctophidae	Diaphus dumerilii (Bleeker, 1856)	2
AT24-2-19	Myctophidae	Diaphus multiserratus Schwarzhans & Aguliera, 2013	1
AT24-2-19	Myctophidae	Diaphus pedemontanus (Robba, 1970)	5
AT24-2-19	Myctophidae	Diaphus rodriguezi Schwarzhans & Aguliera, 2013	15
AT24-2-19	Myctophidae	Myctophidae indet.	82
AT24-2-19	Myctophidae	Lobianchia johnfitchi Schwarzhans & Aguliera, 2013	2
AT24-2-19	Bregmacerotidae	Bregmaceros sp.	1
AT24-2-19	Trachichthyidae	Hoplostethus boyae sp. nov.	1
AT24-2-20	Sternoptychidae	Polyipnus sp.	2
AT24-2-20	Myctophidae	Benthosema pluridens Schwarzhans & Aguliera, 2013	1
AT24-2-20	Myctophidae	Dasyscopelus degraciai (Schwarzhans & Aguliera, 2013)	3
AT24-2-20	Myctophidae	Diaphus aequalis Schwarzhans & Aguliera, 2013	2
AT24-2-20	Myctophidae	Diaphus apalus Schwarzhans & Aguliera, 2013	1
AT24-2-20	Myctophidae	Diaphus pedemontanus (Robba, 1970)	1
AT24-2-20	Myctophidae	Diaphus rodriguezi Schwarzhans & Aguliera, 2013	9
AT24-2-20	Myctophidae	Myctophidae indet.	62
AT24-2-20	Myctophidae	Lobianchia johnfitchi Schwarzhans & Aguliera, 2013	2
AT24-2-20	Myctophidae	Myctophum arcanum Schwarzhans & Aguliera, 2013	1
AT24-2-20	Bregmacerotidae	Bregmaceros sp.	1
AT24-2-20	Malakichthyidae	Malakichthys schwarzhansi sp. nov.	1
AT24-2-21	Congridae	Congridae indet.	1
AT24-2-21	Sternoptychidae	Polyipnus sp.	3
AT24-2-21	Myctophidae	Dasyscopelus degraciai (Schwarzhans & Aguliera, 2013)	4
AT24-2-21	Myctophidae	Dasyscopelus inopinatus sp. nov.	2
AT24-2-21	Myctophidae	Diaphus apalus Schwarzhans & Aguliera, 2013	5
AT24-2-21	Myctophidae	Diaphus dumerilii (Bleeker, 1856)	2
AT24-2-21	Myctophidae	Diaphus rodriguezi Schwarzhans & Aguliera, 2013	17
AT24-2-21	Myctophidae	Myctophidae indet.	67
AT24-2-21	Bregmacerotidae	Bregmaceros sp.	3
AT24-2-22	Sternoptychidae	Polyipnus sp.	2
AT24-2-22	Myctophidae	Dasyscopelus degraciai (Schwarzhans & Aguliera, 2013)	2
AT24-2-22	Myctophidae	Dasyscopelus inopinatus sp. nov.	1
AT24-2-22	Myctophidae	Diaphus aequalis Schwarzhans & Aguliera, 2013	2
AT24-2-22	Myctophidae	Diaphus apalus Schwarzhans & Aguliera, 2013	6
AT24-2-22	Myctophidae	Diaphus dumerilii (Bleeker, 1856)	2
AT24-2-22	Myctophidae	Diaphus multiserratus Schwarzhans & Aguliera, 2013	1
AT24-2-22	Myctophidae	Diaphus rodriguezi Schwarzhans & Aguliera, 2013	11
AT24-2-22	Myctophidae	Myctophidae indet.	73
AT24-2-22	Myctophidae	Myctophum arcanum Schwarzhans & Aguliera, 2013	2
AT24-2-22	Bregmacerotidae	Bregmaceros sp.	2
AT24-2-23	Myctophidae	Dasyscopelus degraciai (Schwarzhans & Aguliera, 2013)	3
AT24-2-23	Myctophidae	Dasyscopelus inopinatus sp. nov.	1
AT24-2-23	Myctophidae	Diaphus aequalis Schwarzhans & Aguliera, 2013	1
AT24-2-23	Myctophidae	Diaphus apalus Schwarzhans & Aguliera, 2013	1
AT24-2-23	Myctophidae	Diaphus dumerilii (Bleeker, 1856)	1
AT24-2-23	Myctophidae	Diaphus pedemontanus (Robba, 1970)	2
AT24-2-23	Myctophidae	Diaphus rodriguezi Schwarzhans & Aguliera, 2013	8
AT24-2-23	Myctophidae	Myctophidae indet.	81
AT24-2-24	Sternoptychidae	Polyipnus sp.	2
AT24-2-24	Myctophidae	Benthosema pluridens Schwarzhans & Aguliera, 2013	1
AT24-2-24	Myctophidae	Dasyscopelus degraciai (Schwarzhans & Aguliera, 2013)	5
AT24-2-24	Myctophidae	Diaphus aequalis Schwarzhans & Aguliera, 2013	4
AT24-2-24	Myctophidae	Diaphus apalus Schwarzhans & Aguliera, 2013	5
AT24-2-24	Myctophidae	Diaphus barrigonensis Schwarzhans & Aguliera, 2013	2
AT24-2-24	Myctophidae	Diaphus dumerilii (Bleeker, 1856)	1
AT24-2-24	Myctophidae	Diaphus pedemontanus (Robba, 1970)	1
AT24-2-24	Myctophidae	Diaphus rodriguezi Schwarzhans & Aguliera, 2013	10
AT24-2-24	Myctophidae	Myctophidae indet.	73
AT24-2-24	Myctophidae	Myctophum arcanum Schwarzhans & Aguliera, 2013	1
AT24-2-24	Myctophidae	Lepidophanes inflectus Schwarzhans & Aguliera, 2013	1
AT24-2-24	Bregmacerotidae	Bregmaceros sp.	1
AT24-2-25	Sternoptychidae	Polyipnus sp.	2
AT24-2-25	Myctophidae	Dasyscopelus degraciai (Schwarzhans & Aguliera, 2013)	9
AT24-2-25	Myctophidae	Diaphus aequalis Schwarzhans & Aguliera, 2013	1
AT24-2-25	Myctophidae	Diaphus apalus Schwarzhans & Aguliera, 2013	3
AT24-2-25	Myctophidae	Diaphus barrigonensis Schwarzhans & Aguliera, 2013	2
AT24-2-25	Myctophidae	Diaphus dumerilii (Bleeker, 1856)	5
AT24-2-25	Myctophidae	Diaphus pedemontanus (Robba, 1970)	5
AT24-2-25	Myctophidae	Diaphus rodriguezi Schwarzhans & Aguliera, 2013	20
AT24-2-25	Myctophidae	Myctophidae indet.	124
AT24-2-25	Myctophidae	Myctophum arcanum Schwarzhans & Aguliera, 2013	1
AT24-2-25	Myctophidae	Lepidophanes inflectus Schwarzhans & Aguliera, 2013	1
AT24-2-25	Myctophidae	Lobianchia johnfitchi Schwarzhans & Aguliera, 2013	1
AT24-2-25	Bregmacerotidae	Bregmaceros sp.	2
AT24-2-26	Sternoptychidae	Polyipnus sp.	5
AT24-2-26	Myctophidae	Benthosema pluridens Schwarzhans & Aguliera, 2013	2
AT24-2-26	Myctophidae	Dasyscopelus degraciai (Schwarzhans & Aguliera, 2013)	9
AT24-2-26	Myctophidae	Diaphus aequalis Schwarzhans & Aguliera, 2013	6
AT24-2-26	Myctophidae	Diaphus apalus Schwarzhans & Aguliera, 2013	4
AT24-2-26	Myctophidae	Diaphus barrigonensis Schwarzhans & Aguliera, 2013	4
AT24-2-26	Myctophidae	Diaphus dumerilii (Bleeker, 1856)	7
AT24-2-26	Myctophidae	Diaphus multiserratus Schwarzhans & Aguliera, 2013	3
AT24-2-26	Myctophidae	Diaphus pedemontanus (Robba, 1970)	2
AT24-2-26	Myctophidae	Diaphus rodriguezi Schwarzhans & Aguliera, 2013	26
AT24-2-26	Myctophidae	Myctophidae indet.	173
AT24-2-26	Myctophidae	Myctophum arcanum Schwarzhans & Aguliera, 2013	2
AT24-2-26	Myctophidae	Lobianchia johnfitchi Schwarzhans & Aguliera, 2013	3
AT24-2-26	Bregmacerotidae	Bregmaceros sp.	5
AT24-2-27	Sternoptychidae	Polyipnus sp.	3
AT24-2-27	Myctophidae	Dasyscopelus degraciai (Schwarzhans & Aguliera, 2013)	3
AT24-2-27	Myctophidae	Dasyscopelus inopinatus sp. nov.	3
AT24-2-27	Myctophidae	Diaphus aequalis Schwarzhans & Aguliera, 2013	4
AT24-2-27	Myctophidae	Diaphus apalus Schwarzhans & Aguliera, 2013	4
AT24-2-27	Myctophidae	Diaphus barrigonensis Schwarzhans & Aguliera, 2013	1
AT24-2-27	Myctophidae	Diaphus dumerilii (Bleeker, 1856)	3
AT24-2-27	Myctophidae	Diaphus pedemontanus (Robba, 1970)	1
AT24-2-27	Myctophidae	Diaphus rodriguezi Schwarzhans & Aguliera, 2013	27
AT24-2-27	Myctophidae	Myctophidae indet.	133
AT24-2-27	Myctophidae	Myctophum arcanum Schwarzhans & Aguliera, 2013	1
AT24-2-27	Bregmacerotidae	Bregmaceros sp.	7
AT24-2-27	Trachichthyidae	Hoplostethus boyae sp. nov.	2
AT24-2-27	indet.	indet.	2
AT24-2-28	Sternoptychidae	Polyipnus sp.	8
AT24-2-28	Myctophidae	Dasyscopelus degraciai (Schwarzhans & Aguliera, 2013)	3
AT24-2-28	Myctophidae	Dasyscopelus inopinatus sp. nov.	3
AT24-2-28	Myctophidae	Diaphus aequalis Schwarzhans & Aguliera, 2013	1
AT24-2-28	Myctophidae	Diaphus apalus Schwarzhans & Aguliera, 2013	5
AT24-2-28	Myctophidae	Diaphus barrigonensis Schwarzhans & Aguliera, 2013	3
AT24-2-28	Myctophidae	Diaphus dumerilii (Bleeker, 1856)	3
AT24-2-28	Myctophidae	Diaphus multiserratus Schwarzhans & Aguliera, 2013	1
AT24-2-28	Myctophidae	Diaphus pedemontanus (Robba, 1970)	2
AT24-2-28	Myctophidae	Diaphus rodriguezi Schwarzhans & Aguliera, 2013	16
AT24-2-28	Myctophidae	Myctophidae indet.	97
AT24-2-28	Myctophidae	Myctophum affine (Lütken, 1892)	1
AT24-2-28	Myctophidae	Lobianchia johnfitchi Schwarzhans & Aguliera, 2013	1
AT24-2-28	Bregmacerotidae	Bregmaceros sp.	4
AT24-2-29	Sternoptychidae	Polyipnus sp.	2
AT24-2-29	Argentinidae	Argentina sp.	1
AT24-2-29	Myctophidae	Benthosema pluridens Schwarzhans & Aguliera, 2013	1
AT24-2-29	Myctophidae	Dasyscopelus degraciai (Schwarzhans & Aguliera, 2013)	7
AT24-2-29	Myctophidae	Diaphus aequalis Schwarzhans & Aguliera, 2013	2
AT24-2-29	Myctophidae	Diaphus apalus Schwarzhans & Aguliera, 2013	4
AT24-2-29	Myctophidae	Diaphus barrigonensis Schwarzhans & Aguliera, 2013	1
AT24-2-29	Myctophidae	Diaphus dumerilii (Bleeker, 1856)	4
AT24-2-29	Myctophidae	Diaphus multiserratus Schwarzhans & Aguliera, 2013	1
AT24-2-29	Myctophidae	Diaphus pedemontanus (Robba, 1970)	2
AT24-2-29	Myctophidae	Diaphus rodriguezi Schwarzhans & Aguliera, 2013	21
AT24-2-29	Myctophidae	Myctophidae indet.	117
AT24-2-29	Myctophidae	Lobianchia johnfitchi Schwarzhans & Aguliera, 2013	1
AT24-2-29	Bregmacerotidae	Bregmaceros sp.	1
AT24-2-30	Sternoptychidae	Polyipnus sp.	3
AT24-2-30	Myctophidae	Dasyscopelus degraciai (Schwarzhans & Aguliera, 2013)	10
AT24-2-30	Myctophidae	Dasyscopelus inopinatus sp. nov.	6
AT24-2-30	Myctophidae	Diaphus aequalis Schwarzhans & Aguliera, 2013	1
AT24-2-30	Myctophidae	Diaphus apalus Schwarzhans & Aguliera, 2013	4
AT24-2-30	Myctophidae	Diaphus dumerilii (Bleeker, 1856)	3
AT24-2-30	Myctophidae	Diaphus multiserratus Schwarzhans & Aguliera, 2013	1
AT24-2-30	Myctophidae	Lepidophanes inflectus Schwarzhans & Aguliera, 2013	1
AT24-2-30	Myctophidae	Diaphus rodriguezi Schwarzhans & Aguliera, 2013	23
AT24-2-30	Myctophidae	Myctophidae indet.	131
AT24-2-30	Myctophidae	Lobianchia johnfitchi Schwarzhans & Aguliera, 2013	2
AT24-2-30	Bregmacerotidae	Bregmaceros sp.	2
AT24-2-31	Sternoptychidae	Polyipnus sp.	4
AT24-2-31	Myctophidae	Dasyscopelus degraciai (Schwarzhans & Aguliera, 2013)	13
AT24-2-31	Myctophidae	Dasyscopelus inopinatus sp. nov.	5
AT24-2-31	Myctophidae	Benthosema pluridens Schwarzhans & Aguliera, 2013	2
AT24-2-31	Myctophidae	Bolinichthys sp.	1
AT24-2-31	Myctophidae	Diaphus apalus Schwarzhans & Aguliera, 2013	2
AT24-2-31	Myctophidae	Diaphus dumerilii (Bleeker, 1856)	6
AT24-2-31	Myctophidae	Diaphus multiserratus Schwarzhans & Aguliera, 2013	1
AT24-2-31	Myctophidae	Lepidophanes inflectus Schwarzhans & Aguliera, 2013	3
AT24-2-31	Myctophidae	Diaphus rodriguezi Schwarzhans & Aguliera, 2013	28
AT24-2-31	Myctophidae	Diaphus pedemontanus (Robba, 1970)	2
AT24-2-31	Myctophidae	Myctophidae indet.	131
AT24-2-31	Myctophidae	Myctophum affine (Lütken, 1892)	1
AT24-2-31	Myctophidae	Myctophum arcanum Schwarzhans & Aguliera, 2013	2
AT24-2-31	Myctophidae	Lobianchia johnfitchi Schwarzhans & Aguliera, 2013	2
AT24-2-31	Bregmacerotidae	Bregmaceros sp.	5
AT24-2-31	Malakichthyidae	Malakichthys schwarzhansi sp. nov.	1
AT24-2-32	Sternoptychidae	Polyipnus sp.	1
AT24-2-32	Myctophidae	Dasyscopelus degraciai (Schwarzhans & Aguliera, 2013)	2
AT24-2-32	Myctophidae	Dasyscopelus inopinatus sp. nov.	4
AT24-2-32	Myctophidae	Diaphus aequalis Schwarzhans & Aguliera, 2013	1
AT24-2-32	Myctophidae	Diaphus apalus Schwarzhans & Aguliera, 2013	3
AT24-2-32	Myctophidae	Diaphus dumerilii (Bleeker, 1856)	3
AT24-2-32	Myctophidae	Diaphus pedemontanus (Robba, 1970)	2
AT24-2-32	Myctophidae	Diaphus rodriguezi Schwarzhans & Aguliera, 2013	7
AT24-2-32	Myctophidae	Myctophidae indet.	85
AT24-2-32	Bregmacerotidae	Bregmaceros sp.	3
AT24-2-33	Sternoptychidae	Polyipnus sp.	2
AT24-2-33	Myctophidae	Bolinichthys sp.	1
AT24-2-33	Myctophidae	Dasyscopelus degraciai (Schwarzhans & Aguliera, 2013)	2
AT24-2-33	Myctophidae	Dasyscopelus inopinatus sp. nov.	3
AT24-2-33	Myctophidae	Diaphus aequalis Schwarzhans & Aguliera, 2013	1
AT24-2-33	Myctophidae	Diaphus apalus Schwarzhans & Aguliera, 2013	5
AT24-2-33	Myctophidae	Diaphus dumerilii (Bleeker, 1856)	4
AT24-2-33	Myctophidae	Diaphus multiserratus Schwarzhans & Aguliera, 2013	1
AT24-2-33	Myctophidae	Diaphus rodriguezi Schwarzhans & Aguliera, 2013	16
AT24-2-33	Myctophidae	Myctophidae indet.	93
AT24-2-33	Myctophidae	Myctophum affine (Lütken, 1892)	1
AT24-2-33	Myctophidae	Lobianchia johnfitchi Schwarzhans & Aguliera, 2013	3
AT24-2-33	Bregmacerotidae	Bregmaceros sp.	2
